# Supplementary material for: [Si(SiMe3)3]6Ge18M (M = Cu, Ag, Au): metalloid cluster compounds as unusual building blocks for a supramolecular chemistry
Source: Royal Society of Chemistry journal article supplement (doi:10.1039/b717506j), 2008-01-01
Supplement: b717506j.pdf [file b717506j.pdf]

# **[Si(SiMe<sub>3</sub>)<sub>3</sub>]<sub>6</sub>Ge<sub>18</sub>M (M = Cu, Ag, Au): Metalloid cluster compounds as unusual building blocks for a supramolecular chemistry .**

**Christian Schenk, Florian Henke, Gustavo Santiso-Quiñones , Ingo**

**Krossing, Andreas Schnepf\***

## **Supporting Information**

### **1.) Gas phase investigations of [AgGe<sub>18</sub>R<sub>6</sub>]<sup>-</sup> (R = Si(SiMe<sub>3</sub>)<sub>3</sub>) **3****

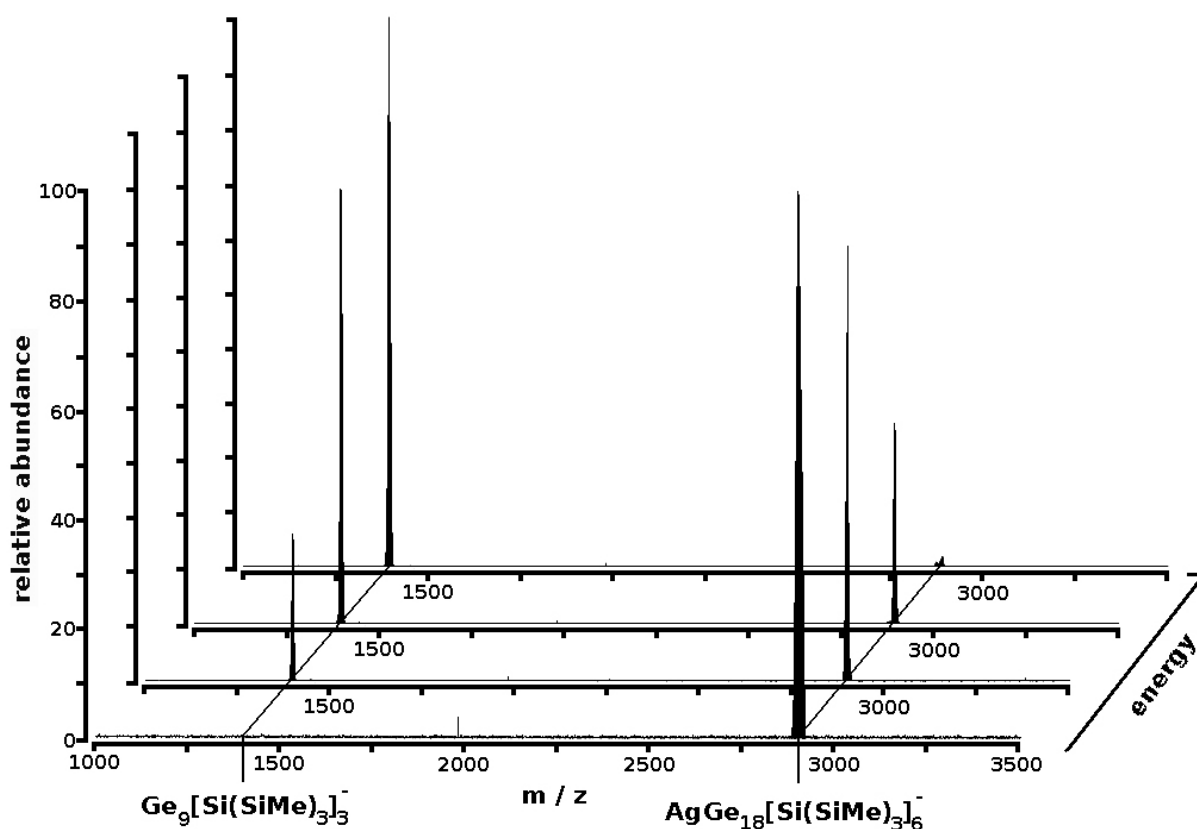

Figure S1: The FT/ICR-mass spectra obtained from a solution of [AgGe<sub>18</sub>R<sub>6</sub>]<sup>-</sup> (R = Si(SiMe<sub>3</sub>)<sub>3</sub>) **3** in thf using ESI as ionisation method. In the dissociation experiments (SORI-CAD) the parent ion **3** dissociates to give the fragment ion Ge<sub>9</sub>R<sub>3</sub><sup>-</sup> (R = Si(SiMe<sub>3</sub>)<sub>3</sub>) **1**. The relative abundance of the fragment ion **1** depends on the translation energy of the parent ion **3** prior to fragmentation. Low energy gives less fragment ion than higher.

2.) Gas phase investigations of  $[\text{CuGe}_{18}\text{R}_6]^-$  ( $\text{R} = \text{Si}(\text{SiMe}_3)_3$ ) **4**

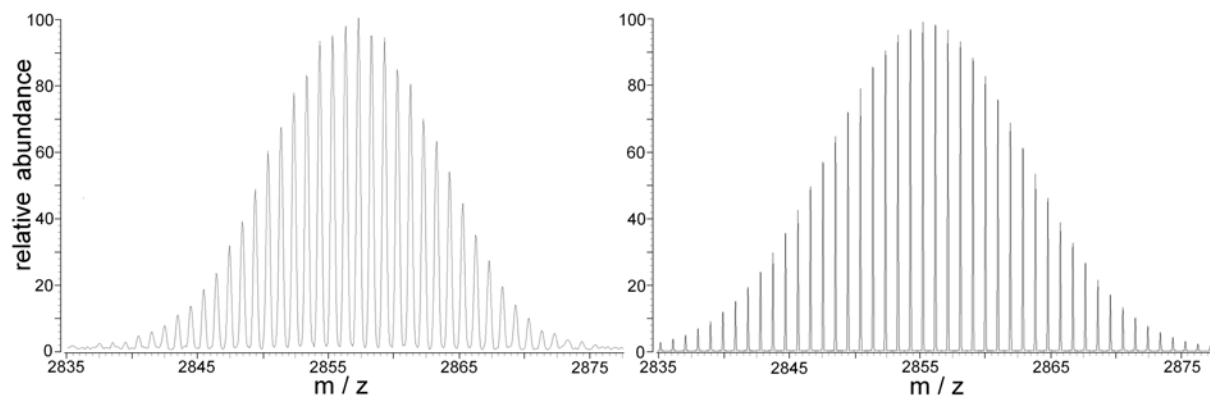

Figure S2: Measured (left) and calculated (right) isotopic pattern of the molecular peak of  $\{\text{CuGe}_{18}[\text{Si}(\text{SiMe}_3)_3]_6\}^-$  **3**.

3.) Schematic presentation of subsequent reactions of  $[\text{AuGe}_{18}\text{R}_6]^-$  **2**,  
 $[\text{AgGe}_{18}\text{R}_6]^-$  **3**,  $[\text{CuGe}_{18}\text{R}_6]^-$  **4** ( $\text{R} = \text{Si}(\text{SiMe}_3)_3$ ).

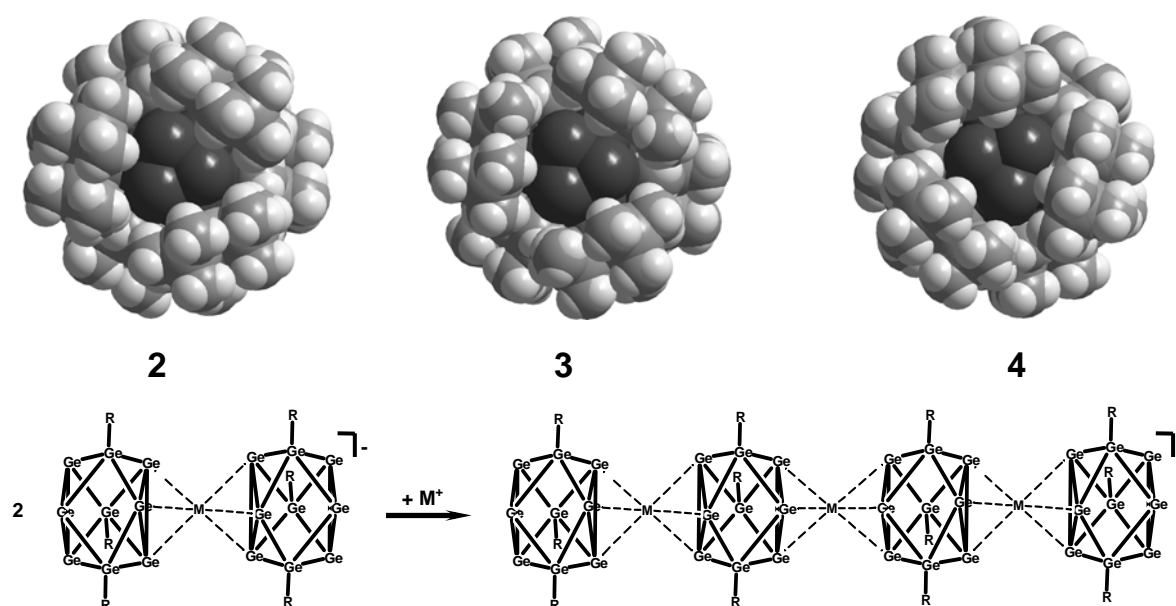

Figure S3: Top: Space filling models of  $[\text{AuGe}_{18}\text{R}_6]^-$  **2**,  $[\text{AgGe}_{18}\text{R}_6]^-$  **3**,  $[\text{CuGe}_{18}\text{R}_6]^-$  **4** ( $\text{R} = \text{Si}(\text{SiMe}_3)_3$ ; view along the threefold axis). Bottom: Schematic presentation of the formation of an  $\text{M}_3\text{Ge}_{36}\text{R}_{12}^-$  unit.
